# Supplementary material for: Fine Mapping of Dominant X-Linked Incompatibility Alleles in Drosophila Hybrids
Source: PubMed Central journal article supplement (PMC3990725; doi:10.1371/journal.pgen.1004270), 2014-04-17
Supplement: pgen.1004270.s001.pdf [file pgen.1004270.s001.pdf]

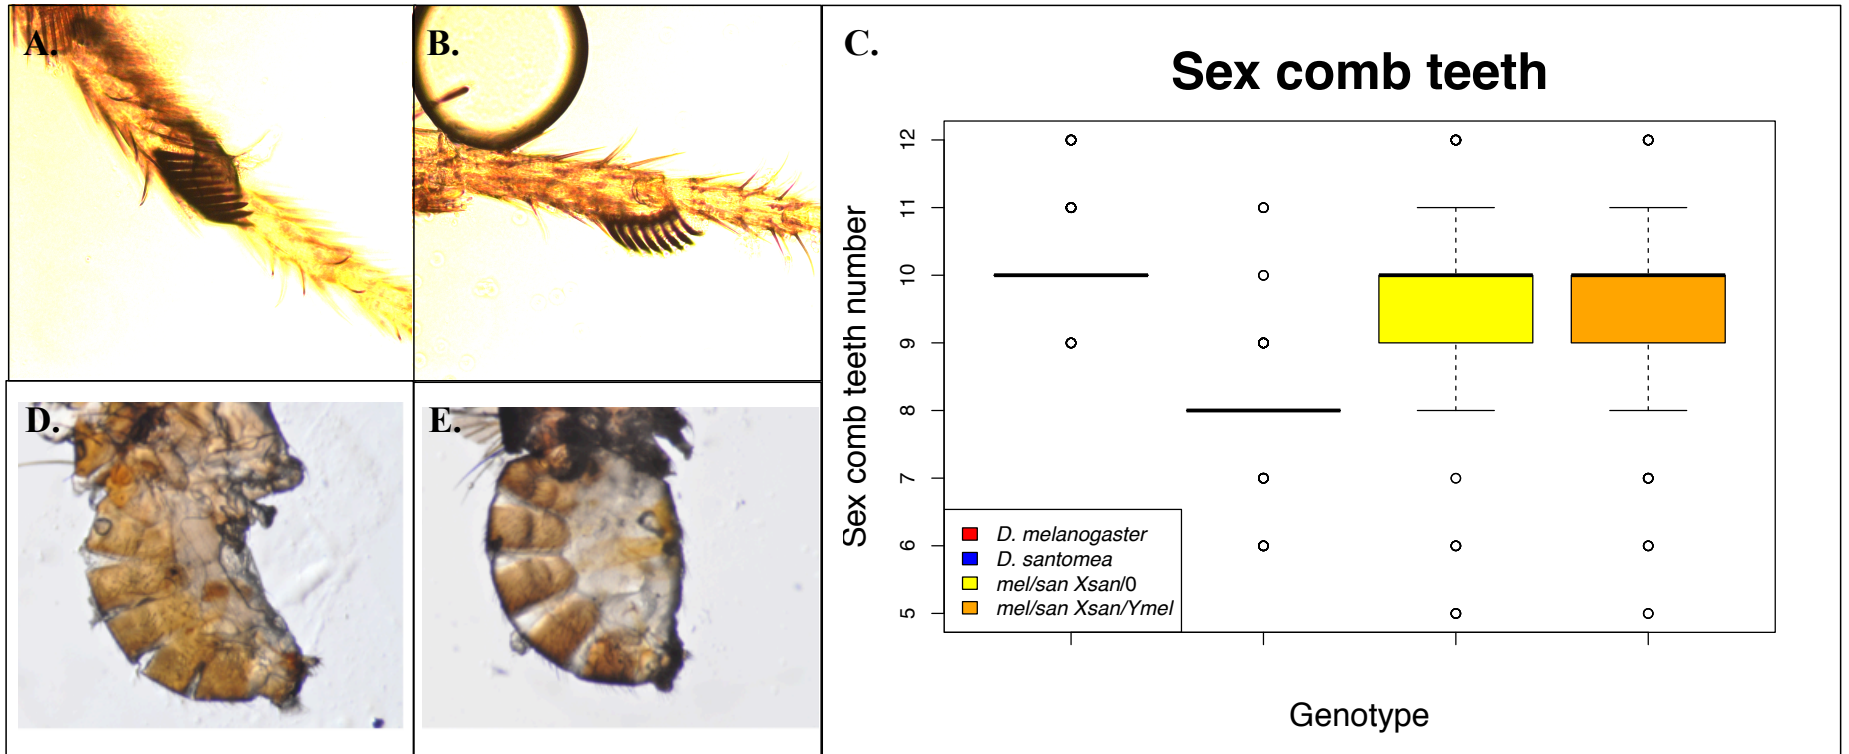

SUPPLEMENTARY FIGURE 1
