# Supplementary material for: Fine Mapping of Dominant X-Linked Incompatibility Alleles in Drosophila Hybrids
Source: PubMed Central journal article supplement (PMC3990725; doi:10.1371/journal.pgen.1004270), 2014-04-17

Controls:  $C(1)RM/Y^{mel} \times san$

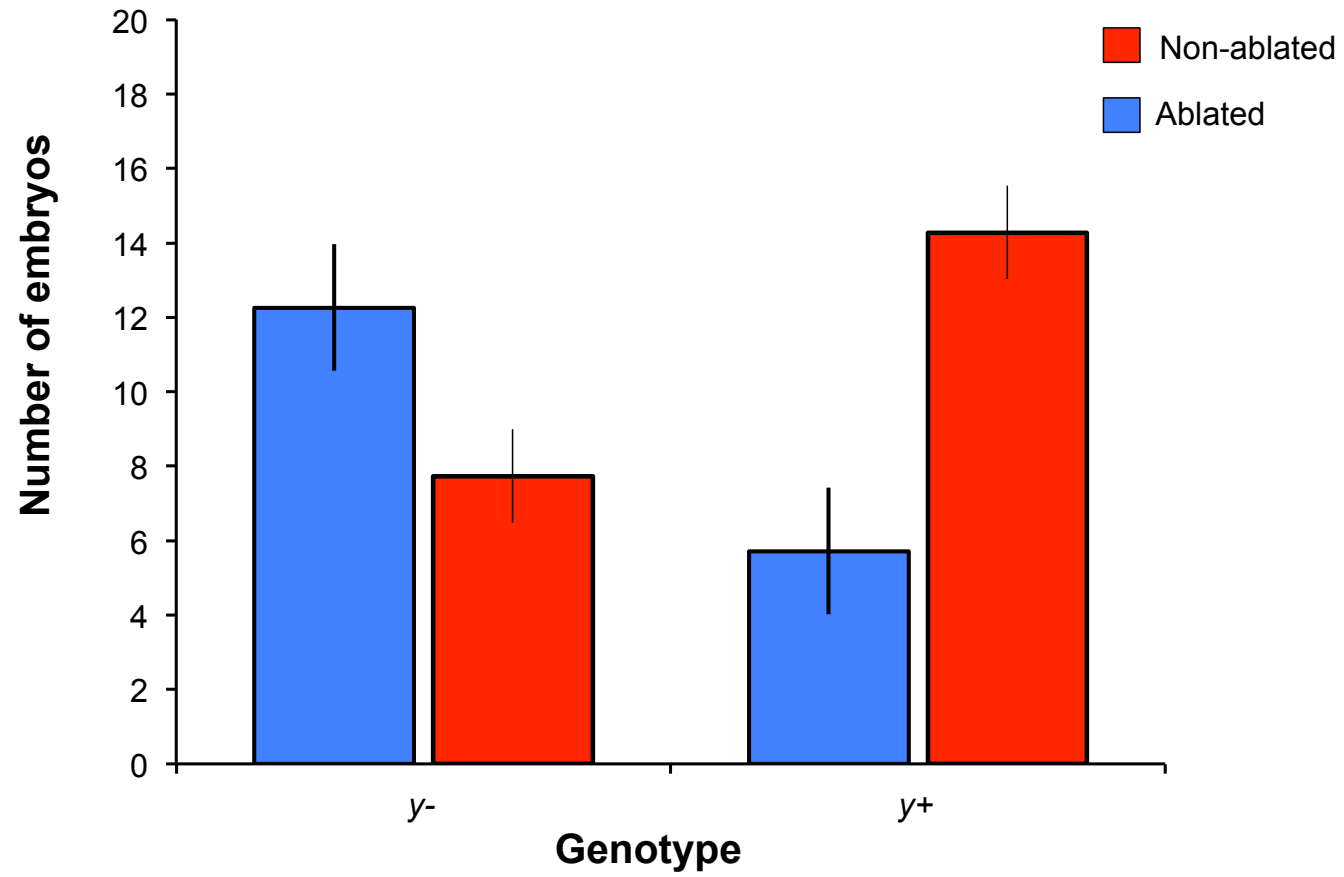

Supplement: pgen.1004270.s003.pdf [file pgen.1004270.s003.pdf]
