# Supplementary material for: Fine Mapping of Dominant X-Linked Incompatibility Alleles in Drosophila Hybrids
Source: PubMed Central journal article supplement (PMC3990725; doi:10.1371/journal.pgen.1004270), 2014-04-17
Supplement: pgen.1004270.s006.pdf [file pgen.1004270.s006.pdf]

 *san* allele causes lethality *mel/san* ♀

 *mel* allele causes embryonic lethality in *mel/san* ♂

 *mel* allele causes pupal lethality in *mel/san* ♂

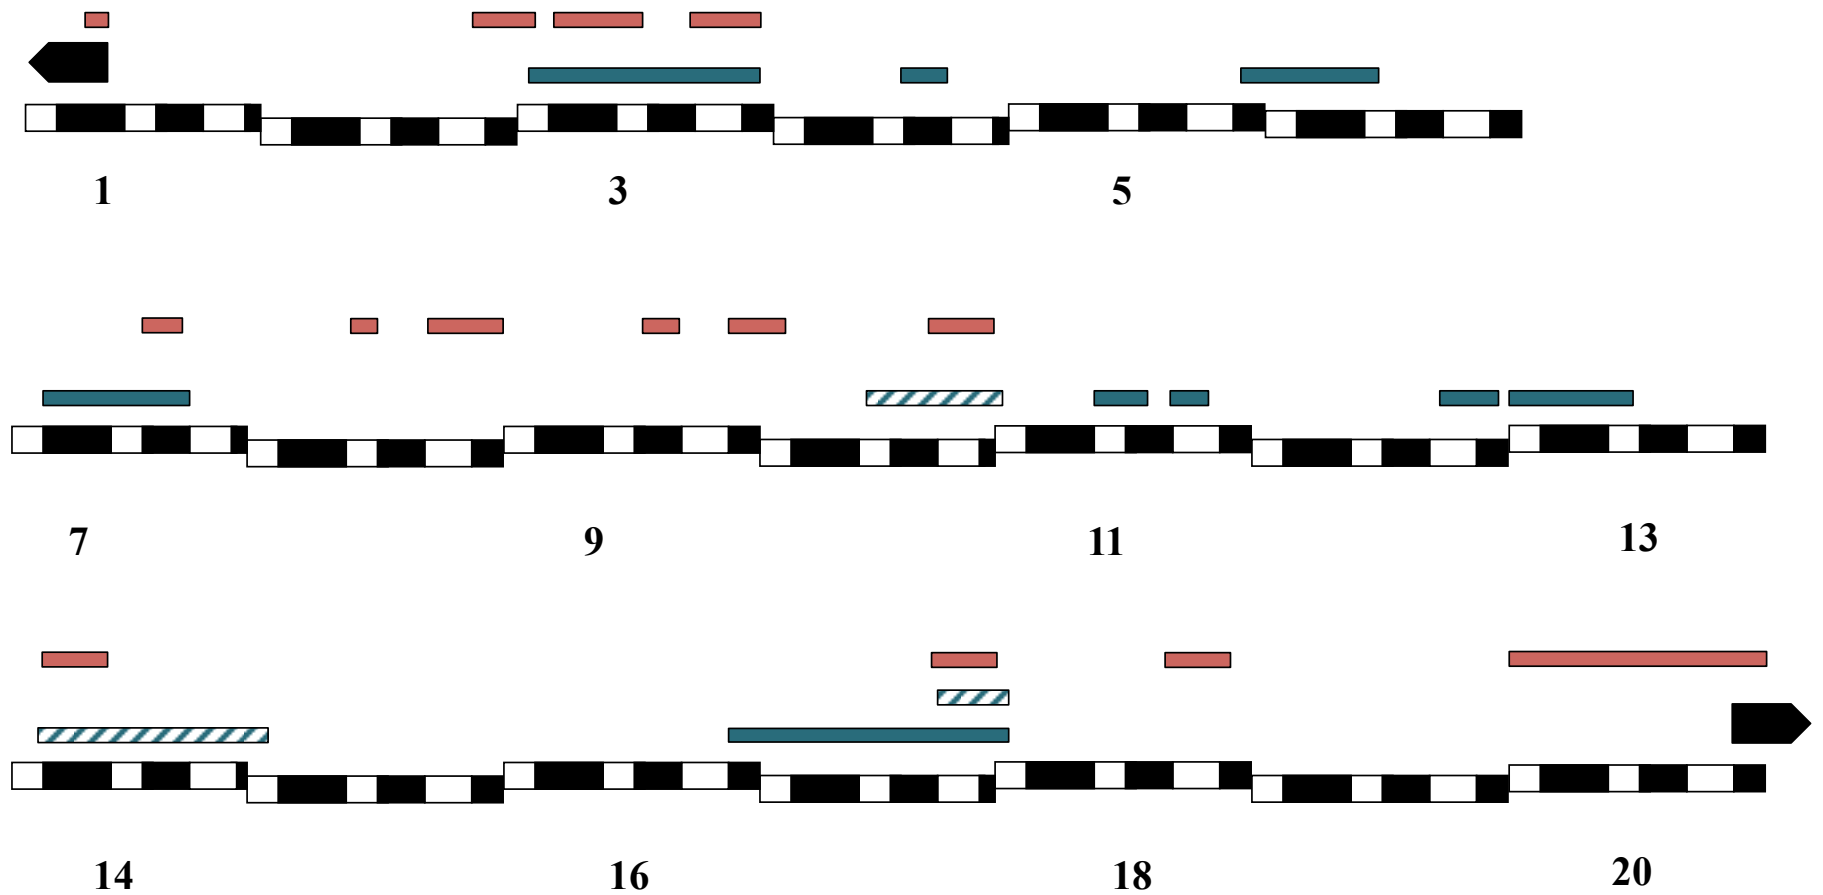

SUPPLEMENTARY FIGURE 5
