# Supplementary material for: Fine Mapping of Dominant X-Linked Incompatibility Alleles in Drosophila Hybrids
Source: PubMed Central journal article supplement (PMC3990725; doi:10.1371/journal.pgen.1004270), 2014-04-17

**QQ Plot: embryo viability *mel/sim***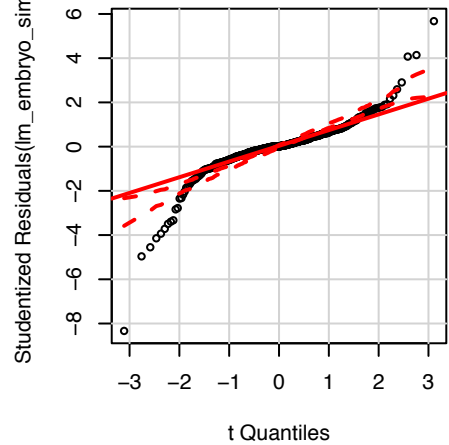**QQ Plot: larval viability *mel/sim***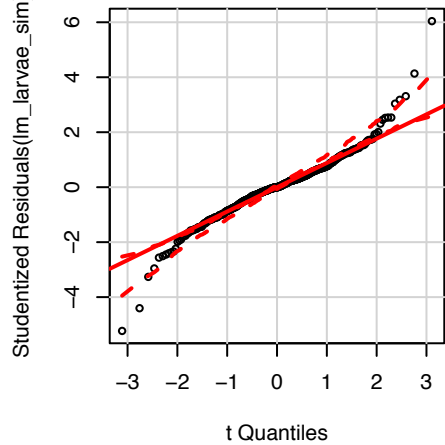**QQ Plot: pupal viability *mel/sim***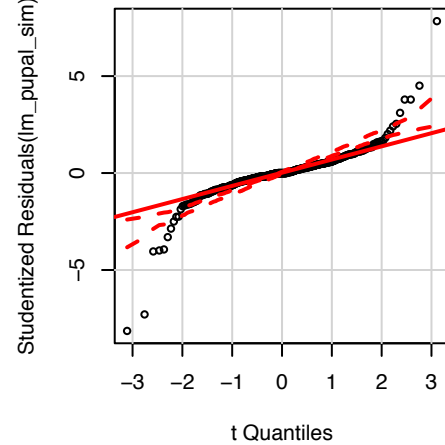**QQ Plot: embryo viability *mel/mau***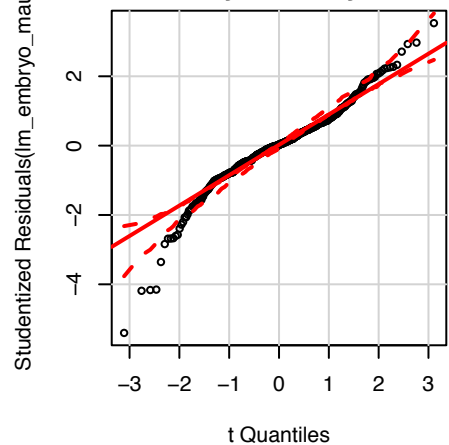**QQ Plot: larval viability *mel/mau***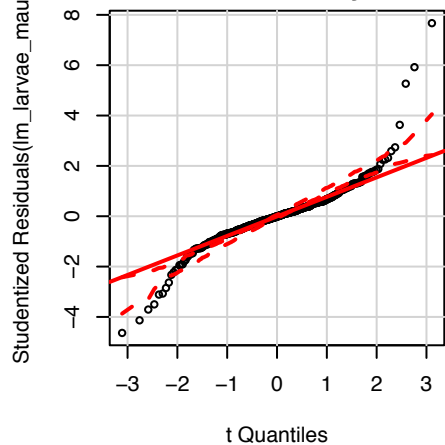**QQ Plot: pupal viability *mel/mau***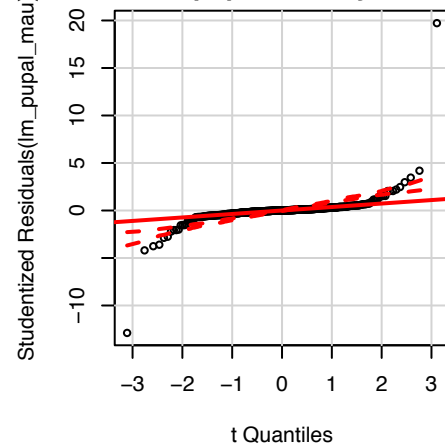**QQ Plot: embryo viability *mel/san***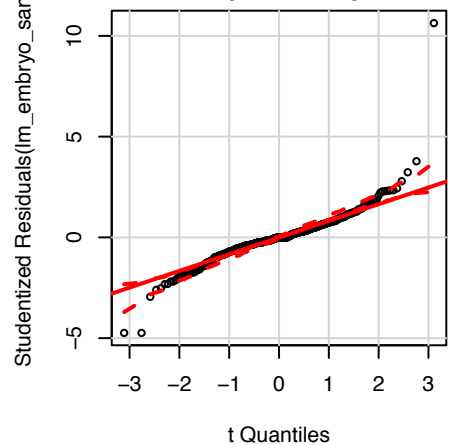**QQ Plot: larval viability *mel/san***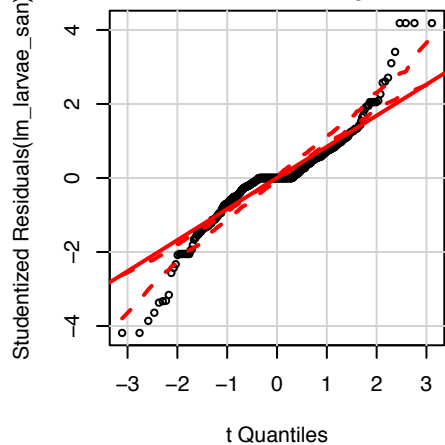**QQ Plot: pupal viability *mel/san***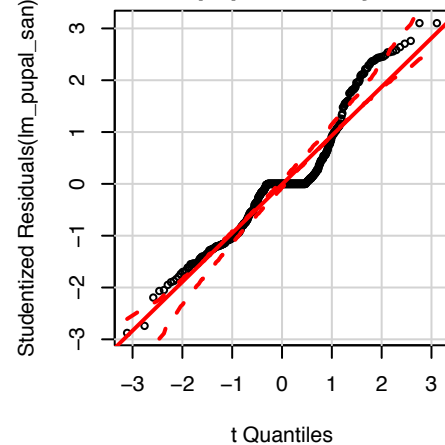

Supplement: pgen.1004270.s007.pdf [file pgen.1004270.s007.pdf]
